# Supplementary material
Source: MDPI journal article supplement (https://www.mdpi.com/2071-1050/12/18/7657)

# SDM ML Algorithm Models: Current & Future Emission Scenario Habitat Predictions

Random Forest Model Current, SSP2-4.5  
& SSP3-7.0 Habitat Predictions

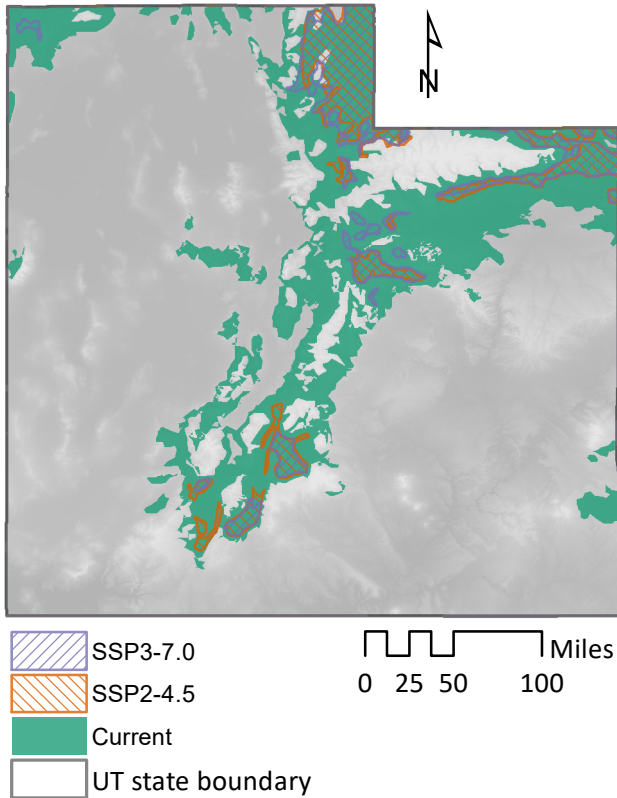

MaxEnt Model Current, SSP2-4.5  
& SSP3-7.0 Habitat Predictions

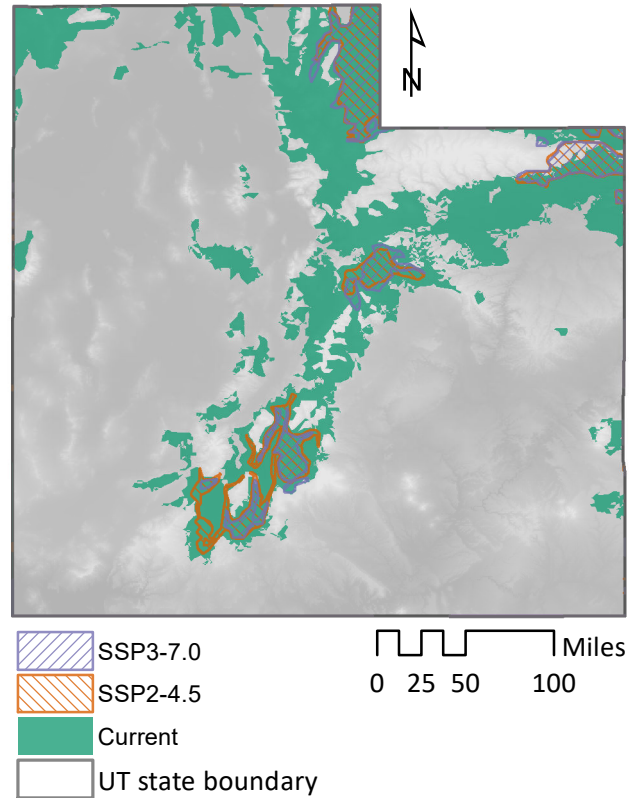

Support Vector Machine Model Current, SSP2-4.5  
& SSP3-7.0 Habitat Predictions

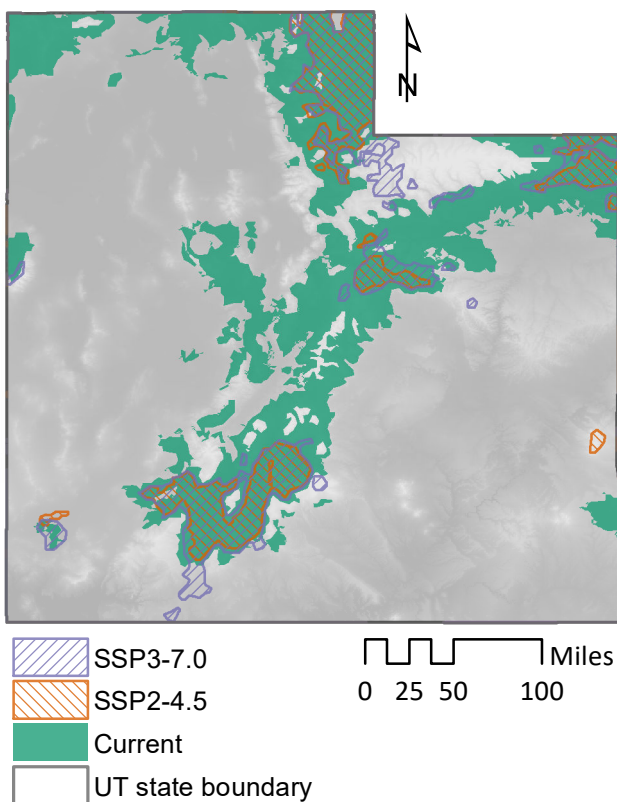

Artificial Neural Network Model Current, SSP2-4.5  
& SSP3-7.0 Habitat Predictions

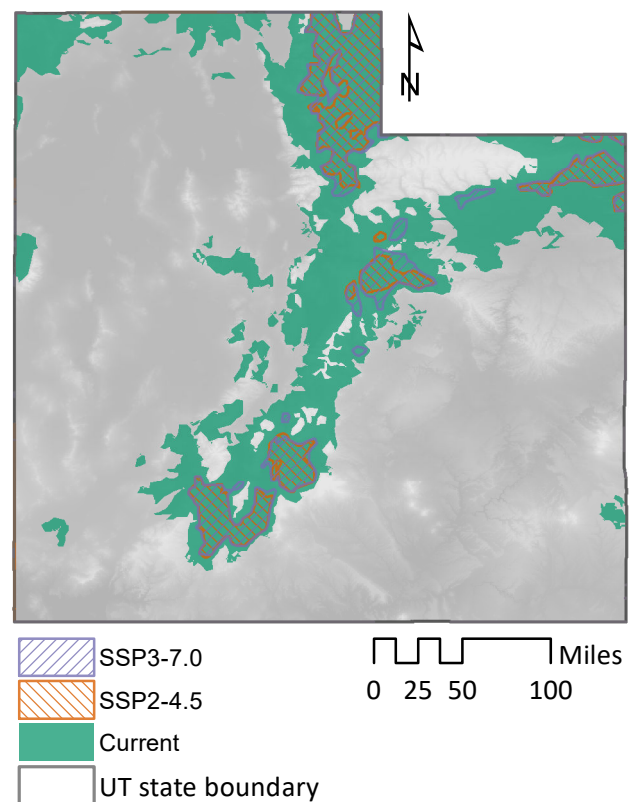

Supplement: s1 [file s1]
