# Supplementary material
Source: MDPI journal article supplement (https://www.mdpi.com/2071-1050/12/18/7657)
Supplement: s1 [file s1]

# Current Sage-grouse Habitat Prediction Model Results

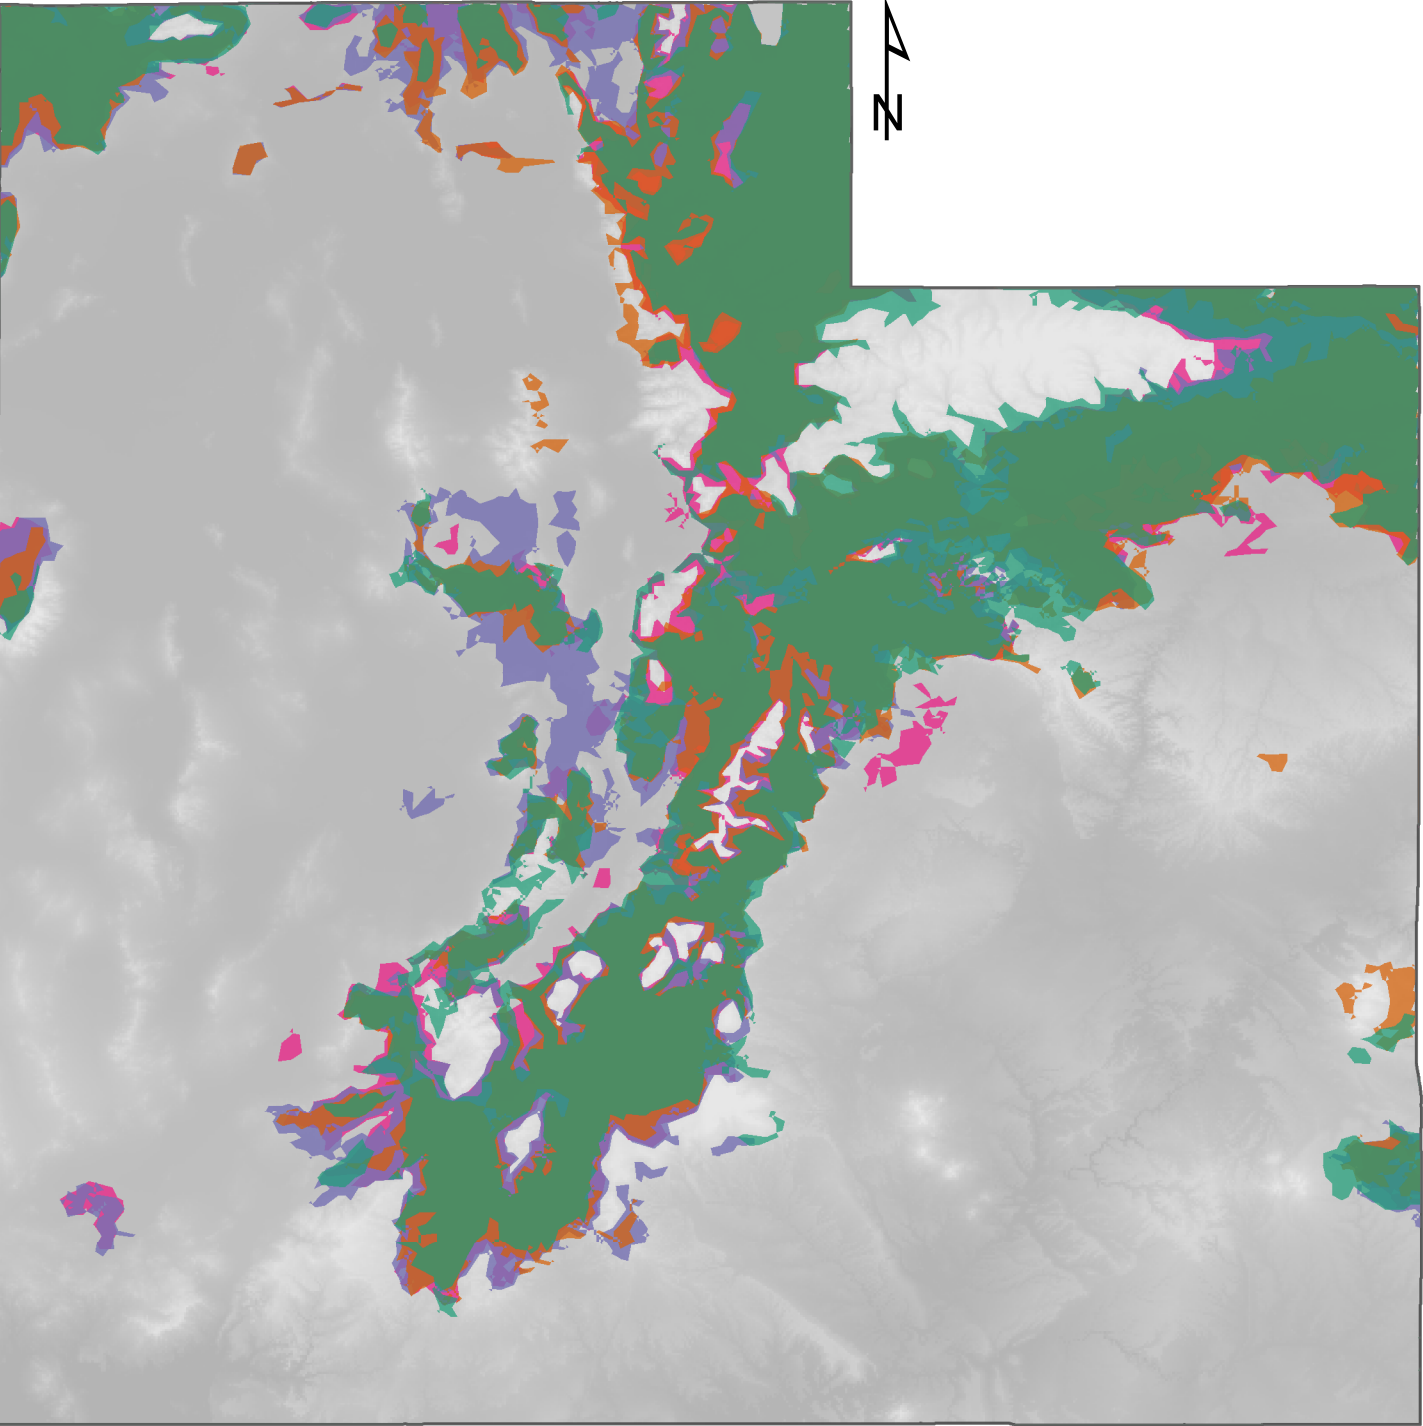

**SDM ML algorithm current habitat prediction**

- Random Forest
- MaxEnt
- Support Vector Machine
- Artificial Neural Network
- UT state boundary

# Future Emission Scenario SSP2-4.5 Sage-grouse Habitat Prediction Model Results

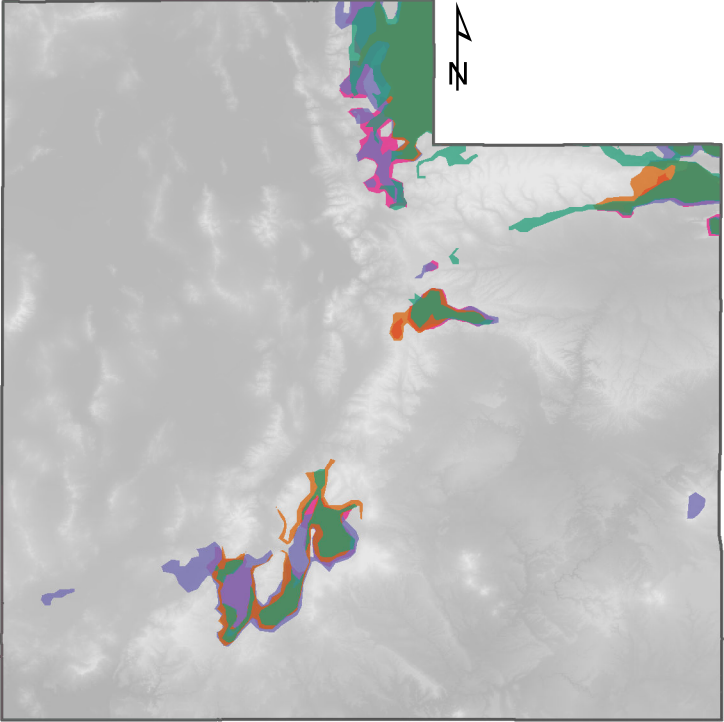

- SSP2-4.5 habitat prediction**
- Random Forest
  - Maxent
  - Support Vector Machine
  - Artificial Neural Network
  - UT state boundary

0 25 50 100 Miles

# Future Emission Scenario SSP3-7.0 Sage-grouse Habitat Prediction Model Results

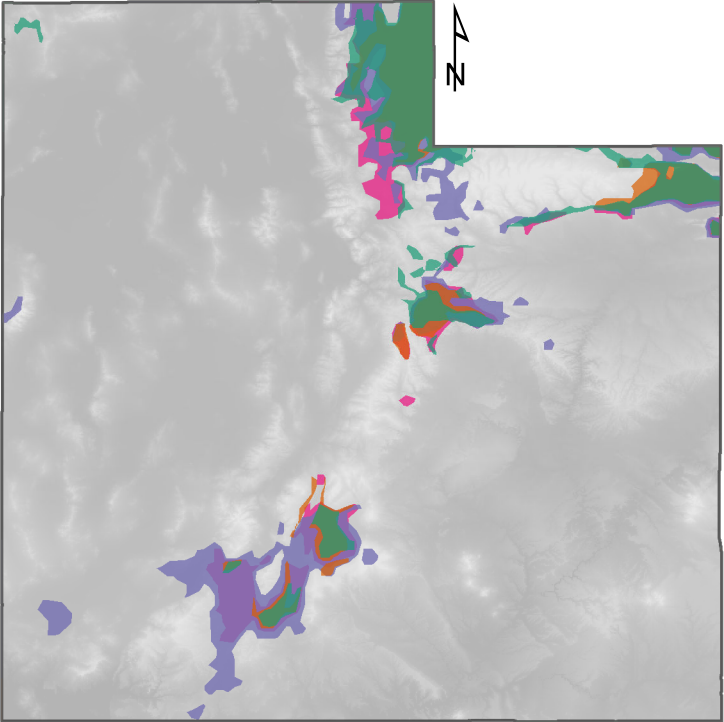

- SSP3-7.0 habitat prediction**
- Random Forest
  - MaxEnt
  - Support Vector Machine
  - Artificial Neural Network
  - UT state boundary

0 25 50 100 Miles
